# Supplementary material
Source: PubMed Central journal article supplement (PMC4109970)
Supplement: NIHMS607676-supplement-support_information.pdf [file NIHMS607676-supplement-support_information.pdf]

## Simultaneous Detection of Nucleic Acid and Protein Using Gold nanoparticles and Lateral Flow Device

Xun MAO,\* Anant GURUNG,\* Hui XU,\* Meenu BALODA,\* Yuqing HE,\*\*† Guodong LIU\*†

\* *Department of Chemistry and Molecular Biology, North Dakota State University, Fargo, ND 58105, USA*

\*\* *Institute of Medical Systems Biology, Guangdong Medical College, Zhanjiang, Guangdong 524023, P. R. China*

---

† To whom correspondence should be addressed.

E-mail: [guodong.liu@ndsu.edu](mailto:guodong.liu@ndsu.edu) (G. L.); [dr.hyq@hotmail.com](mailto:dr.hyq@hotmail.com) (Y. H.)

### Supporting information

#### *Preparation of GNP-DNA and GNP-Ab conjugates*

Before conjugation reaction, the thiolated oligonucleotide was activated. Generally, 98  $\mu\text{L}$  thiolated DNA probe 1 (1.0 OD) was mixed with 2  $\mu\text{L}$  triethylamine and 7.7 mg DTT to react for 30 min at RT, then the excess DTT was moved by four-time extractions with 400  $\mu\text{L}$  ethylacetate solution. Conjugation reaction was then carried out by adding 1 OD of activated DNA probe 1 to 1 mL of the 5-fold concentrated GNPs solution. After standing at 4  $^{\circ}\text{C}$  for 24 h, the solution was subjected to “aging” by the addition of NaCl up to a concentration of 150 mM, and certain quantity of 1 % sodium dodecyl sulfate (SDS) was simultaneous added to

reach a final concentration of 0.01 %. The solution was allowed to stand for another 24 h at 4 °C, and the excess of reagents was removed by centrifugation at 12000 rpm for 20 min. The supernatant was discarded, and the red pellet was redispersed in 1 mL of eluent buffer containing 20 mM Na<sub>3</sub>PO<sub>4</sub>, 5% BSA, 0.25% Tween and 10% sucrose.

The GNP-Ab conjugate was prepared by addition of 50 µg of goat anti-rabbit IgG Ab to 1 mL of pH-adjusted GNPs solution followed by incubation at room temperature with periodic gentle mixing for 1 h,<sup>1</sup> during which the goat anti-rabbit IgG Ab adsorbed onto the surface of GNPs through a combination of ionic and hydrophobic interactions. Then certain volume of 10 % BSA was slowly added to the mixture solution to a final concentration of 1 %. After gentle stirring for 30 minutes, the conjugate was centrifuged at 18000 rpm for 10 min. Two phases can be obtained: a clear to pink supernatant of unbound antibody and a dark red, loosely packed sediment of the GNP-Ab. The supernatant was discarded and the soft sediment of GNP-Ab conjugates was rinsed by resuspending in 1 mL of PBS (1 % BSA) and collected after a second centrifugation at 18000 rpm for 10 min. Finally, the conjugate was resuspended in 1 mL of eluent buffer to increase stability of GNP-Ab and minimize nonspecific adsorption during the assays. Conjugates were stored at 4 °C.

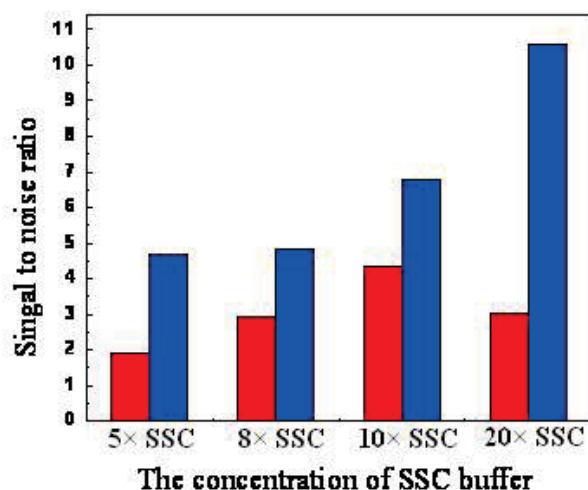

Fig. S1 Effect of the concentration of SSC buffer on the signal to noise ratios of the LFD for simultaneous detection of DNA and R-IgG. The red and blue bars represent the signal to noise ratio of DNA and R-IgG test, respectively. 10 nM target DNA and 10 ng mL<sup>-1</sup> R-IgG were used. The SSC buffers were prepared by diluting the SSC stocking solution (20 times concentrated). Other conditions, same as in Fig. 2.

### References

1. X. Chu, X. Fu, K. Chen, G. Shen, and R. Yu, *Biosens. Bioelectron.*, **2005**, *20*, 1805
